# Supplementary material for: Quality evaluation for measurements of wind field and turbulent fluxes from a UAV-based eddy covariance system
Source: Copernicus journal article supplement (doi:10.5194/amt-16-5659-2023), 2023-11-23
Supplement: Supplementary file 1 [file amt-16-5659-2023-supplement.pdf]

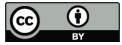

*Supplement of*

## **Quality evaluation for measurements of wind field and turbulent fluxes from a UAV-based eddy covariance system**

**Yibo Sun et al.**

*Correspondence to:* Bilige Sude (sude@craes.org.cn) and Shaomin Liu (smliu@bnu.edu.cn)

The copyright of individual parts of the supplement might differ from the article licence.

1 The intention of this supplement is to guide the readers through the relevant equations about calculation of geo-referenced  
2 wind, turbulent fluxes as well as their measurement uncertainties, and to provide the procedures in calibration the mounting  
3 misalignment using the measured data from ‘box’ flight maneuver. Part A provides the formulas necessary to compute the  
4 geo-referenced 3D wind vector and their measurement error. Part B gives the detailed equations to calculate the fluxes of  
5 sensible heat, latent heat, carbon dioxide (CO<sub>2</sub>), and the method to quantify the measurement uncertainty in them due to  
6 instrument noise. Part C provides the procedure and results for calibrating the mounting misalignment based on ‘box’ flight  
7 maneuver. References to the literatures are given at the end of this supplement.

## 8 **1 Part A: Detailed equations for calculating the geo-referenced wind vector and measurement precision**

9 Wind measurement by aircraft is challenging. The wind measurement components of the UAV-based EC system consist of  
10 sensors that measure air pressure (static and dynamic pressure), air temperature, and aircraft attitude, position, velocity, and  
11 angular velocity. From these measurements, two velocity vectors  $U_a$  (velocity of the air with respect to the aircraft) and  $U_p$   
12 (velocity of the aircraft with respect to the Earth) are derived. The velocity of wind with respect to earth (i.e., geo-referenced  
13 wind vector) is the result of adding these two vectors together, as:

$$14 \quad U = U_a + U_p \quad (S1)$$

15 For our developed UAV-based EC system, this text provides the detailed formulas necessary to compute the geo-referenced  
16 wind vector. Approaches to compute the geo-referenced wind vector based on the combination of a multi-hole probe and  
17 navigation system are often similar in principle (Crawford and Dobosy, 1992; Williams and Marcotte, 2000; Khelif et al., 1999;  
18 Metzger et al., 2011). Figure S1 illustrates the transformational relation for calculating the geo-referenced wind vector by the  
19 current UAV-based EC system.

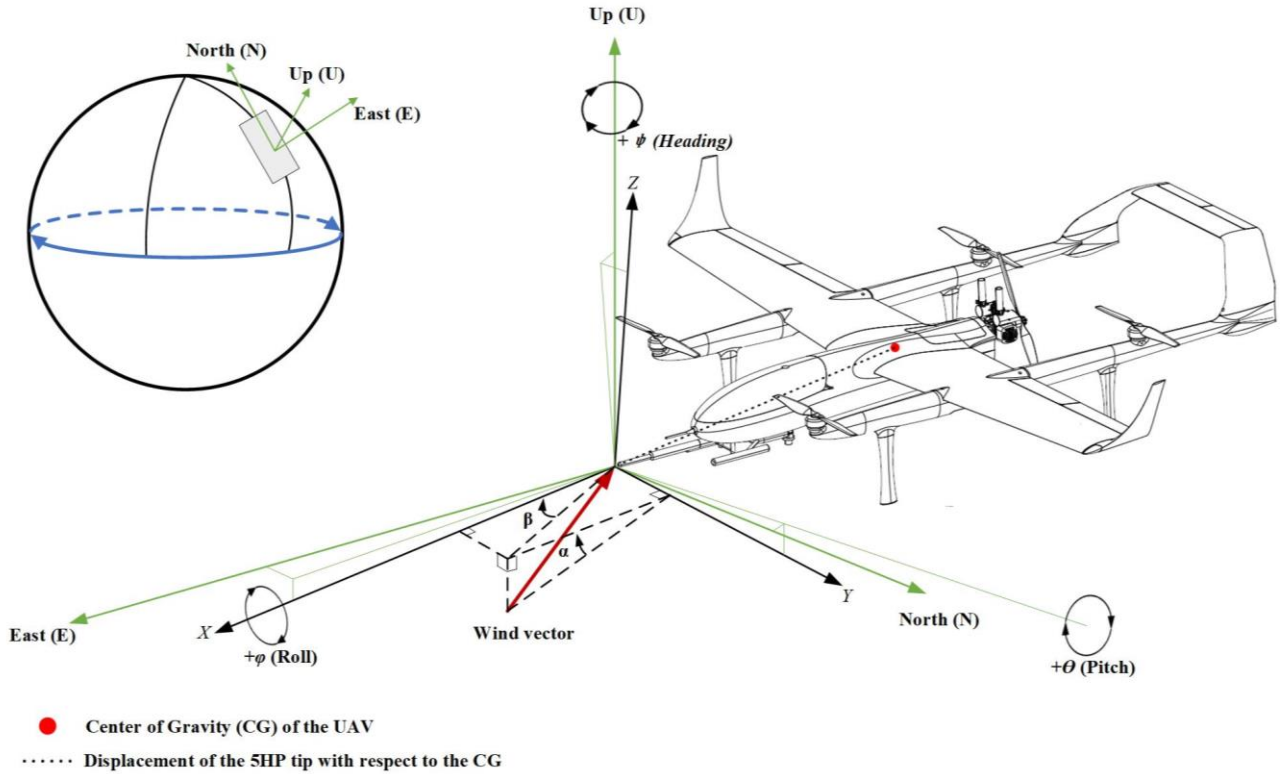

20

21 **Figure S1. Diagram of the coordinate transformational relation for calculating geo-referenced wind vector. The green coordinate**  
 22 **represents the geo-referenced coordinate system. The black coordinate represents the aircraft coordinate system.**

23 Two coordinate systems are involved in calculating the geo-referenced wind vector: aircraft coordinate system (black in Fig.  
 24 S1,  $X$ , positive forward,  $Y$ , to port, and  $Z$ , toward the airplane's roof) and geographic coordinate system (green in Fig. S1,  $E$ ,  
 25 positive eastward,  $N$ , northward, and  $U$ , upward). A transformation matrix, which is defined by measurements of the three  
 26 conventional attitude angles: roll ( $\varphi$ ), pitch ( $\theta$ ), and heading ( $\psi$ ), accomplished rotation from the aircraft to the geographic  
 27 coordinate. They must be applied in the following order: roll, pitch, and heading to convert from aircraft coordinate to  
 28 geographic coordinate, and heading, pitch, and roll to convert the other way. The probe does not have to be located at the  
 29 origin of the aircraft coordinate system. Based on the basic aircraft kinematics and the wind calculation equation given by  
 30 Lenschow (1986), considering the influence of tangential velocity of rotation on the probe tip, the full expression to compute  
 31 the geo-referenced wind vector can be expressed as:

$$32 \quad U(t) = G(t)\hat{U}_a(t) + U_p(t) + \Omega_p(t) \times R_p \quad (S2)$$

33 The unadorned symbols in Eq. (S2) are in geographic coordinate. The aircraft's coordinate is denoted by ("^").  $G$  is the  
 34 transformation matrix.  $\Omega_p$  is the angular rate of the aircraft. The relative wind vector  $\hat{U}_a$  are measured by the five-hole probe  
 35 (5HP) mounted on the nose of the UAV, usually extended on the forward part of the aircraft to reduce the measurable effects  
 36 of the airflow distortion by the wing. The components of  $G$ ,  $U_p$  and  $\Omega_p$  are obtained from the integrated navigation system

37 (INS) outputs, which originate from the center of gravity (CG) of the UAV.  $U_p$  contains three velocity components toward  
 38 east ( $u_p$ ), west ( $v_p$ ), and upward ( $w_p$ ).  $R_p$  is the vector distance from the CG of the UAV to the 5HP tip.

39 The rotation matrix  $G$  from airplane to earth coordinates is computed in factored form by sequentially removing the  
 40 dependence of the observed data on roll, pitch, and heading together with a relabeling of axes. The first rotation  $T_1(\varphi)$  removes  
 41 roll: it is a rotation about the  $X$ -axes with matrix representation:

$$42 \quad T_1(\varphi) = \begin{bmatrix} 1 & 0 & 0 \\ 0 & \cos\varphi & -\sin\varphi \\ 0 & \sin\varphi & \cos\varphi \end{bmatrix} \quad (S3)$$

43 The next rotation  $T_2(\theta)$  removes pitch:

$$44 \quad T_2(\theta) = \begin{bmatrix} \cos\theta & 0 & \sin\theta \\ 0 & 1 & 0 \\ -\sin\theta & 0 & \cos\theta \end{bmatrix} \quad (S4)$$

45 The last rotation  $T_3(\psi)$  removes heading:

$$46 \quad T_3(\psi) = \begin{bmatrix} \cos\psi & -\sin\psi & 0 \\ \sin\psi & \cos\psi & 0 \\ 0 & 0 & 1 \end{bmatrix} \quad (S5)$$

47 The present coordinates of the hypothetical aircraft frame point north, east, and down, and must be transformed to east,  
 48 north and up. This is done with the permutation  $T_4$ :

$$49 \quad T_4 = \begin{bmatrix} 0 & 1 & 0 \\ 1 & 0 & 0 \\ 0 & 0 & -1 \end{bmatrix} \quad (S6)$$

50 Then, the total transformation  $G$  between the coordinates is the matrix product:

$$51 \quad G = T_4 T_3(\psi) T_2(\theta) T_1(\varphi) = \begin{bmatrix} \sin\psi\cos\theta & \cos\psi\cos\varphi + \sin\psi\sin\theta\sin\varphi & \sin\psi\sin\theta\cos\varphi - \cos\psi\sin\varphi \\ \cos\psi\cos\theta & -\sin\psi\cos\varphi + \cos\psi\sin\theta\sin\varphi & \sin\psi\sin\varphi + \cos\psi\sin\theta\cos\varphi \\ \sin\theta & -\cos\theta\sin\varphi & \cos\theta\cos\varphi \end{bmatrix} \quad (S7)$$

52 In addition, offset corrections ( $\varepsilon_\varphi, \varepsilon_\theta, \varepsilon_\psi$ ) are introduced here to correct for possible mounting misalignment in angle  
 53 between the CG and the probe's tip. The values of these correction constants are determined via dedicated flight maneuvers  
 54 (in Part C). Due to the offset in  $\varphi$  had an insignificant effect on the computed wind speed (Van Den Kroonenberg et al., 2008),  
 55 therefore,  $\varepsilon_\varphi$  was not included in the calibration and was set to 0. Then, the three-rotation angle could be expressed as:

$$56 \quad \begin{cases} \varphi = \varphi_i \\ \theta = \theta_i + \varepsilon_\theta \\ \psi = \psi_i + \varepsilon_\psi \end{cases} \quad (S8)$$

57 where  $\varphi_i$ ,  $\theta_i$ , and  $\varepsilon_\psi$  are the INS measured attitude angle.

58 The cross-product term ( $\Omega_p \times R_p$ ) in Eq. (S2) describe the “lever arm” effect due to the tip of the 5HP not being placed at  
59 the CG of the UAV, and all are defined in earth coordinates. In the UAV, the displacement of the 5HP tip with respect to the  
60 CG of the UAV along the  $X$ -axis ( $L = 1.459$  m) is larger than the displacement along the  $Y$ -axis (0 m), and  $Z$ -axis (0.173 m),  
61 so that the lateral and vertical separation distances can be negligible. Then,  $R_p$  can be expressed as:

$$62 \quad R_p = G(t) \cdot \begin{bmatrix} L \\ 0 \\ 0 \end{bmatrix} = \begin{bmatrix} L \cos \psi \cos \theta \\ L \sin \psi \cos \theta \\ -L \sin \theta \end{bmatrix} \quad (S9)$$

63 Similarly,  $\Omega_p$  can be expressed as:

$$64 \quad \Omega_p = \begin{bmatrix} 0 \\ 0 \\ \dot{\psi} \end{bmatrix} + \begin{bmatrix} \cos \psi & -\sin \psi & 0 \\ \sin \psi & \cos \psi & 0 \\ 0 & 0 & 1 \end{bmatrix} \cdot \begin{bmatrix} 0 \\ \dot{\theta} \\ 0 \end{bmatrix} + \begin{bmatrix} \cos \psi \cos \theta & -\sin \psi & \cos \psi \sin \theta \\ \sin \psi \cos \theta & \cos \psi & \sin \psi \sin \theta \\ -\sin \theta & 0 & \cos \theta \end{bmatrix} \cdot \begin{bmatrix} \dot{\phi} \\ 0 \\ 0 \end{bmatrix} = \begin{bmatrix} -\dot{\theta} \sin \psi + \dot{\phi} \cos \psi \cos \theta \\ \dot{\theta} \cos \psi + \dot{\phi} \sin \psi \cos \theta \\ \dot{\psi} - \dot{\phi} \sin \theta \end{bmatrix} \quad (S10)$$

65 Thus,

$$66 \quad \Omega_p \times R_p = T_4 L \begin{bmatrix} -\dot{\theta} \sin \theta \cos \psi - \dot{\psi} \sin \psi \cos \theta \\ \dot{\psi} \cos \psi \cos \theta - \dot{\theta} \sin \psi \sin \theta \\ -\dot{\theta} \cos \theta \end{bmatrix} \quad (S11)$$

67 Then, converting to a meteorological and inertial navigation frame of reference:

$$68 \quad \Omega_p \times R_p = L \begin{bmatrix} \dot{\psi} \cos \psi \cos \theta - \dot{\theta} \sin \psi \sin \theta \\ -\dot{\theta} \sin \theta \cos \psi - \dot{\psi} \sin \psi \cos \theta \\ \dot{\theta} \cos \theta \end{bmatrix} \quad (S12)$$

69 where  $\dot{\psi}$  and  $\dot{\theta}$  are the angular velocity of heading ( $\psi$ ) and pitch ( $\theta$ ) angle. The air velocity component ( $\hat{U}_a$ ) with respect to  
70 the aircraft is measured by 5HP. In addition, wind measurements by aircraft are subject to flow distortion and needed to be  
71 corrected. According to Vellinga et al. (2013) and Crawford et al. (1996), considering the influence of lift-induced upwash,  
72 the wind components with respect to the aircraft ( $\hat{u}_a, \hat{v}_a, \hat{w}_a$ ), can be calculated as:

$$73 \quad \hat{U}_a = \begin{bmatrix} \hat{u}_a \\ \hat{v}_a \\ \hat{w}_a \end{bmatrix} = \frac{|U_a|}{D} \begin{bmatrix} -1 \\ \tan \beta \\ \tan \alpha \end{bmatrix} + w_u \begin{bmatrix} \sin \chi \\ 0 \\ -\cos \chi \end{bmatrix} \quad (S13)$$

$$74 \quad D = (1 + \tan^2 \alpha + \tan^2 \beta)^{1/2} \quad (S14)$$

75 where  $|U_a|$  is the magnitude of the true airspeed,  $\alpha$  is the angle of attack (the airstream with respect to the aircraft in the  
76 aircraft’s vertical plane, with positive in the downward direction),  $\beta$  is the angle of sideslip (the angle of the airstream with  
77 respect to the aircraft in the aircraft’s horizontal plane, with clockwise positive rotation),  $w_u$  is the vortex’s tangential velocity  
78 experienced at the probe tip (i.e., lift-induced upwash), and  $\chi$  is the vertical separation angle probe to wing (Vellinga et al.,  
79 2013). For UAV applications, the influence of flow distortion can be ignored because the probe is long enough. For the

80 measurement of true airspeed, the details of converting the pressures (static and dynamic) and total air temperature measured  
 81 by the 5-hole probe (5HP) to the magnitude of the relative true airspeed were given in Sun et al. (2021). Lastly, integrating the  
 82 equations above, the final geo-referenced wind vectors ( $u, v, w$ ) are:

$$83 \quad u = u_p - |U_a|D^{-1}[\sin\psi\cos\theta + \tan\beta(\cos\psi\cos\phi + \sin\psi\sin\theta\sin\phi) + \tan\alpha(\sin\psi\sin\theta\cos\phi - \cos\psi\sin\phi)] -$$

$$84 \quad L(\dot{\theta}\sin\theta\sin\psi - \dot{\psi}\cos\psi\cos\theta) \quad (S15)$$

$$85 \quad v = v_p - |U_a|D^{-1}[\cos\psi\cos\theta - \tan\beta(\sin\psi\cos\phi - \cos\psi\sin\theta\sin\phi) + \tan\alpha(\cos\psi\sin\theta\cos\phi + \sin\psi\sin\phi)] -$$

$$86 \quad L(\dot{\psi}\sin\psi\cos\theta + \dot{\theta}\cos\psi\sin\theta) \quad (S16)$$

$$87 \quad w = w_p - |U_a|D^{-1}[\sin\theta - \tan\beta\cos\theta\sin\phi - \tan\alpha\cos\theta\cos\phi] + L\dot{\theta}\cos\theta \quad (S17)$$

88 The last term on the right-hand of Eqs. (S15) to (S17) is the leverage effect correction term.

89 Former and the current (Section 3.1 in the main article) studies have shown that the influence of the leverage effect on the  
 90 wind measurement could be neglected when the spatial separation ( $L$ ) between the tip of the 5HP and the CG of the aircraft is  
 91 small (e.g., less than 10 m) and the aircraft is not undergoing a pilot-induced pitching maneuver (Lenschow, 1986; Rautenberg  
 92 et al., 2019). This simplification greatly reduced the complexity of geo-referenced wind vector calculation. For estimating the  
 93 measurement precision ( $1\sigma$ ) of the geo-reference wind vector from aircraft, Enriquez and Friehe (1995) gave the linearized  
 94 Taylor series expansions of Eqs. (S15) to (S17) to determine the sensitivities of each of the geo-referenced wind velocity  
 95 components with respect to each of the measured variables. By ignoring the leverage effect correction term and giving the  
 96 assumptions of a negligible pitch angle (i.e., small-angle approximation), according to the equations derived by Enriquez and  
 97 Friehe (1995), the  $1\sigma$  uncertainty in the 3D wind vector due to the  $1\sigma$  measurement error of the output physical quantity from  
 98 the related sensor module can be approximated by:

$$99 \quad \sigma_{u,U_a} \approx \sigma_{U_a} \sin\psi, \sigma_{u,\beta} \approx \sigma_\beta U_a \cos\psi, \sigma_{u,\psi} \approx \sigma_\psi U_a \cos\psi, \sigma_{u,u_p} \approx \sigma_{u_p} \quad (S18)$$

$$100 \quad \sigma_{v,U_a} \approx \sigma_{U_a} \cos\psi, \sigma_{v,\beta} \approx \sigma_\beta U_a \sin\psi, \sigma_{v,\psi} \approx \sigma_\psi U_a \cos\psi, \sigma_{v,v_p} \approx \sigma_{v_p} \quad (S19)$$

$$101 \quad \sigma_{w,\alpha} \approx \sigma_\alpha U_a, \sigma_{w,\theta} \approx \sigma_\theta U_a, \sigma_{w,w_p} \approx \sigma_{w_p} \quad (S20)$$

102 where  $\sigma_{u,U_a}$ ,  $\sigma_{u,\beta}$ ,  $\sigma_{u,\psi}$ ,  $\sigma_{u,u_p}$ ,  $\sigma_{v,U_a}$ ,  $\sigma_{v,\beta}$ ,  $\sigma_{v,\psi}$ , and  $\sigma_{v,v_p}$  represent the partial derivative of geo-reference horizontal wind  
 103 component ( $u$  and  $v$ ) with respect to  $U_a$ ,  $\beta$ ,  $\psi$ , and  $u_p$  or  $v_p$ .  $\sigma_{w,\alpha}$ ,  $\sigma_{w,\theta}$ , and  $\sigma_{w,w_p}$  represent the partial derivative of geo-  
 104 reference vertical wind ( $w$ ) with respect to  $\alpha$ ,  $\theta$ , and  $w_p$ .  $\sigma_{U_a}$ ,  $\sigma_\alpha$ , and  $\sigma_\beta$  are the measurement precision ( $1\sigma$ ) of the directly  
 105 measured variables  $U_a$ ,  $\alpha$ , and  $\beta$  from 5HP.  $\sigma_\psi$ ,  $\sigma_\theta$ ,  $\sigma_{u_p}$ ,  $\sigma_{v_p}$ , and  $\sigma_{w_p}$  are the measurement precision ( $1\sigma$ ) of the attitude and  
 106 velocity directly output by INS. Propagation of the contributions from each sensitivity item can give a good estimate of the  
 107 overall measurement precision in computing the geo-referenced 3D wind vector (Garman et al., 2006). Eqs. (S18) to (S20) can  
 108 then be combined to compute the overall measurement precision ( $1\sigma$ ) in the geo-referenced 3D wind vector ( $\sigma_u, \sigma_v, \sigma_w$ ):

$$109 \quad \sigma_u = \sqrt{\sigma_{u,u_a}^2 + \sigma_{u,\beta}^2 + \sigma_{u,\psi}^2 + \sigma_{u,u_p}^2} \quad (\text{S21})$$

$$110 \quad \sigma_v = \sqrt{\sigma_{v,u_a}^2 + \sigma_{v,\beta}^2 + \sigma_{v,\psi}^2 + \sigma_{v,v_p}^2} \quad (\text{S22})$$

$$111 \quad \sigma_w = \sqrt{\sigma_{w,\alpha}^2 + \sigma_{w,\theta}^2 + \sigma_{w,w_p}^2} \quad (\text{S23})$$

## 112 **2 Part B: Calculation of the turbulent fluxes and their uncertainty**

113 Calculation of the turbulent fluxes from aircraft follow the theory of conventional eddy covariance (EC) technique taking  
 114 into account all the necessary corrections for open-path gas analyzer (Gioli et al., 2006; Aubinet et al., 2012). The main  
 115 difference between airborne and ground-based EC is in the averaging approaches, that aircraft use spatial instead of time  
 116 averaging to calculate the turbulent fluctuations of wind vertical component and associated scalars (Gioli et al., 2006;  
 117 Crawford et al., 1996). As an example, the spatial average of vertical wind ( $\bar{w}$ ) is defined as:

$$118 \quad \bar{w} = \frac{1}{\overline{U_p T}} \sum_i w_i U_{p_i} \Delta t \quad (\text{S24})$$

119 where  $\overline{U_p}$  is the mean ground speed of the aircraft,  $U_{p_i}$  is the instantaneous ground speed,  $\Delta t$  is time increment, and  $T$  is the  
 120 total time over the averaging space. Then, the geo-referenced wind components ( $u$ ,  $v$ ,  $w$ ) are rotated using double rotation  
 121 manner to force the average value of the lateral and the vertical wind components equals zero ( $\bar{v} = 0$ ,  $\bar{w} = 0$ ). Subsequently,  
 122 turbulent fluxes are calculated and corrected for density effects due to heat and water vapor transfer [Webb-Pearman-Leuning  
 123 (WPL) correction, Webb et al. (1980)]. The final equations for calculating the fluxes of sensible heat (H), latent heat (LE), and  
 124 CO<sub>2</sub> after WPL correction can be expressed as:

$$125 \quad H = \rho_c \overline{w' T_a'} \quad (\text{S25})$$

$$126 \quad LE = \lambda(1 + \mu\sigma) \left( \overline{w' \rho_v'} + \frac{\bar{\rho}_v}{T} \overline{w' T_a'} \right) \quad (\text{S26})$$

$$127 \quad F_C = \overline{w' \rho_c'} + \mu \frac{\bar{\rho}_c}{\bar{\rho}_a} \overline{w' \rho_v'} + (1 + \mu\sigma) \frac{\bar{\rho}_c}{T_a} \overline{w' T_a'} \quad (\text{S27})$$

128 where the overbar denotes the average value, the prime denotes fluctuations in variable about its average value;  $\rho$ ,  $\rho_v$ ,  $\rho_c$ , and  
 129  $\rho_a$  are the densities of air, water vapor, CO<sub>2</sub>, and dry air, respectively;  $\mu = m_a/m_v$  and  $\sigma = \bar{\rho}_v/\bar{\rho}_a$ ;  $m_a$  and  $m_v$  are the  
 130 molecular mass of dry and water vapor, respectively.  $T_a$  is the air temperature.

131 For assessment of the flux measurement error, the partial derivatives of Eqs. (S25) to (S27) with respect to their flux value  
 132 derived by Liu et al. (2006) were used:

$$133 \quad \frac{\sigma_H}{H} = \frac{\sigma_{w' T_a'}}{w' T_a'} \quad (\text{S28})$$

$$134 \quad \frac{\sigma_{LE}}{LE} = \left[ \frac{w' \rho_v'}{w' T_a'} \frac{\sigma_{w' \rho_v'}}{w' \rho_v'} + \frac{\bar{\rho}_v}{T} \frac{\sigma_{w' T_a'}}{w' T_a'} \right] / \left[ \frac{w' \rho_v'}{w' T_a'} + \frac{\bar{\rho}_v}{T_a} \right] \quad (\text{S29})$$

$$\frac{\sigma_{Fc}}{Fc} = \frac{\overline{w' \rho_c'}}{Fc} \frac{\sigma_{w' \rho_c'}}{\overline{w' \rho_c'}} + \frac{\mu \overline{w' \rho_v'}}{Fc} \frac{\overline{\rho_c}}{\overline{\rho_d}} \frac{\sigma_{w' \rho_v'}}{\overline{w' \rho_v'}} + \frac{\overline{\rho_c w' T_a'} (1 + \mu \sigma)}{T Fc} \frac{\sigma_{w' T_a'}}{\overline{w' T_a'}} \quad (\text{S30})$$

The above expressions ignored the perturbations terms from the errors in the individual scalar (i.e.,  $\rho_v$ ,  $\rho_c$ ,  $T$ ) which were proved negligible small (Serrano-Ortiz et al., 2008). Then, these equations are used to estimate the impact of instrumental noise incurred in measurements of raw sensible heat, latent heat and CO<sub>2</sub> fluxes covariance on the final calculated fluxes (as propagated through the WPL terms).

### 3 Part C: Calibration results of the ‘box’ flight maneuver

In our calibration flight campaign, the first ‘box’ flight maneuver was used to correct the mounting misalignment in heading ( $\epsilon_\psi$ ) and pitch ( $\epsilon_\theta$ ) angles between the 5HP and the CG of the UAV. The offset in roll angle ( $\epsilon_\phi$ ) was not included in the calibration and was set to 0° since its influence on the wind calculation is minimal. The detailed procedure for acquiring the calibration parameter  $\epsilon_\psi$  and  $\epsilon_\theta$  are given in Vellinga et al. (2013) and Sun et al. (2021). The calibration of the UAV-based EC system should occur in ideal atmospheric conditions, i.e., a constant mean horizontal wind component, near zero mean vertical wind. During the calibration, only the data from the straight sections of the ‘box’ flight maneuver were used. The calibration values  $\epsilon_\psi$  and  $\epsilon_\theta$  were both determined iteratively until their values reached a steady state.

Before calibration,  $\epsilon_\psi$  and  $\epsilon_\theta$  were set to their default value (0°). The offset  $\epsilon_\theta$  was first calibrated. The value of  $\epsilon_\theta$  was set to vary within the typical range of  $\pm 1^\circ$ , and the mean vertical wind component ( $\bar{w}$ ) was iteratively calculated using a step length of 0.2° to find the value of  $\epsilon_\theta$  for which  $\bar{w}$  is zero. The individual straight sections of the ‘box’ maneuver are used. The results are shown in Figure S2. The average offset was calculated and served as the final value used in Eq. S8. The final iterative step resulted in an offset of -0.183° for  $\epsilon_\theta$ .

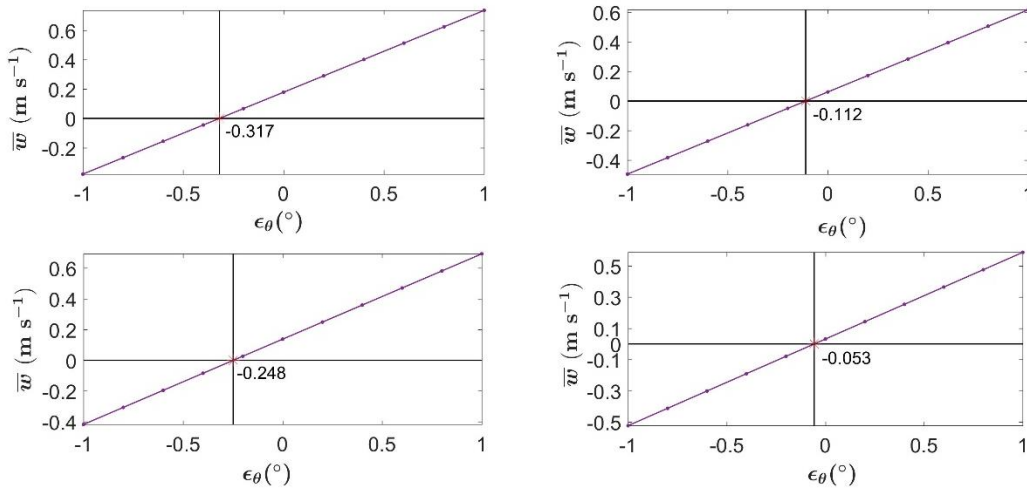

Figure S2. Offset values ( $\epsilon_\theta$ ) in the pitch angle corresponding to the zero-averaged value of the vertical wind component ( $\bar{w} = 0$ ). The final offset value ( $\epsilon_\theta$ ) in the pitch angle was calculated by averaging the determined offset value from the individual straight sections of the ‘box’ maneuver.



157 Next, the offset  $\epsilon_\psi$  was calibrated by setting the possible value to vary within the range between  $0^\circ$  and  $4^\circ$  and by iteratively  
 158 calculating the horizontal wind speed using a step length of  $0.5^\circ$ . The final offset  $\epsilon_\psi$  was determined from the straight sections  
 159 of the ‘box’ maneuver by finding the minimum variances for horizontal wind direction ( $\sigma_{U_{dir}}$ ) and wind speed velocity ( $\sigma_U$ ).  
 160 Figure S3 shows the results for  $\epsilon_\psi$  from the final iterative session of the calibration. Figure S3b shows that  $\sigma_{U_{dir}}$  and  $\sigma_U$  reach  
 161 their minima at the offset value of  $1.822^\circ$  and  $2.178^\circ$ , respectively. The final offset value  $\epsilon_\psi$  is determined as their average of  
 162  $2^\circ$ .

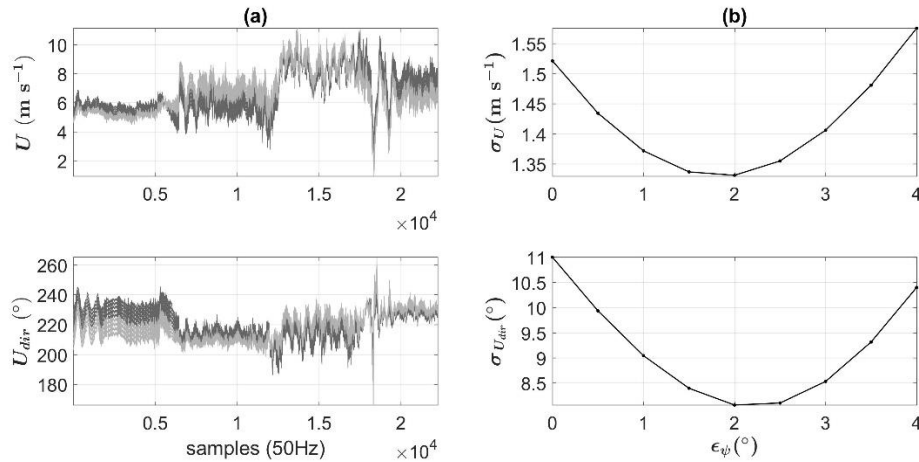

163

164 **Figure S3. Offset values ( $\epsilon_\theta$ ) in the pitch angle corresponding to the zero-averaged value of the vertical wind component ( $\bar{w} = 0$ ).**  
 165 **The final offset value ( $\epsilon_\theta$ ) in the pitch angle was calculated by averaging the determined offset value from the individual straight**  
 166 **sections of the ‘box’ maneuver.**

## 167 References

- 168 Aubinet, M., Vesala, T., and Papale, D.: Eddy Covariance: A Practical Guide to Measurement and Data Analysis, Springer  
 169 Atmospheric Sciences, Springer Netherlands, XXII, 438 pp., 10.1007/978-94-007-2351-1, 2012.
- 170 Crawford, T. L. and Dobosy, R. J.: A sensitive fast-response probe to measure turbulence and heat flux from any airplane,  
 171 Boundary-Layer Meteorology, 59, 257-278, 10.1007/BF00119816, 1992.
- 172 Crawford, T. L., Dobosy, R. J., and Dumas, E. J.: Aircraft wind measurement considering lift-induced upwash, Boundary-  
 173 Layer Meteorology, 80, 79-94, 10.1007/BF00119012, 1996.
- 174 Enriquez, A. G. and Friehe, C. A.: Effects of Wind Stress and Wind Stress Curl Variability on Coastal Upwelling, Journal of  
 175 Physical Oceanography, 25, 1651-1671, [https://doi.org/10.1175/1520-0485\(1995\)025<1651:EOWSAW>2.0.CO;2](https://doi.org/10.1175/1520-0485(1995)025<1651:EOWSAW>2.0.CO;2), 1995.
- 176 Garman, K. E., Hill, K. A., Wyss, P., Carlsen, M., Zimmerman, J. R., Stirm, B. H., Carney, T. Q., Santini, R., and Shepson, P.  
 177 B.: An Airborne and Wind Tunnel Evaluation of a Wind Turbulence Measurement System for Aircraft-Based Flux  
 178 Measurements, Journal of Atmospheric and Oceanic Technology, 23, 1696-1708, 10.1175/JTECH1940.1, 2006.

179 Gioli, B., Miglietta, F., Vaccari, F. P., and Zaldei, A.: The Sky Arrow ERA, an innovative airborne platform to monitor mass,  
180 momentum and energy exchange of ecosystems, *Annals of Geophysics*, 49, 109-116, 10.4401/ag-3159, 2006.

181 Khelif, D., Burns, S. P., and Friehe, C. A.: Improved Wind Measurements on Research Aircraft, *Journal of Atmospheric and*  
182 *Oceanic Technology*, 16, 860-875, 10.1175/1520-0426(1999)016<0860:IWMORA>2.0.CO;2, 1999.

183 Lenschow, D. H.: Aircraft Measurements in the Boundary Layer, in: *Probing the Atmospheric Boundary Layer*, edited by:  
184 Lenschow, D. H., American Meteorological Society, Boston, MA, Boston, [https://doi.org/10.1007/978-1-944970-14-7\\_5](https://doi.org/10.1007/978-1-944970-14-7_5),  
185 1986.

186 Liu, H., Randerson, J. T., Lindfors, J., Massman, W. J., and Foken, T.: Consequences of Incomplete Surface Energy Balance  
187 Closure for CO<sub>2</sub> Fluxes from Open-Path CO<sub>2</sub>/H<sub>2</sub>O Infrared Gas Analysers, *Boundary-Layer Meteorology*, 120, 65-85,  
188 10.1007/s10546-005-9047-z, 2006.

189 Metzger, S., Junkermann, W., Butterbach-Bahl, K., Schmid, H. P., and Foken, T.: Measuring the 3-D wind vector with a  
190 weight-shift microlight aircraft, *Atmos. Meas. Tech.*, 4, 1421-1444, 10.5194/amt-4-1421-2011, 2011.

191 Rautenberg, A., Allgeier, J., Jung, S., and Bange, J.: Calibration Procedure and Accuracy of Wind and Turbulence  
192 Measurements with Five-Hole Probes on Fixed-Wing Unmanned Aircraft in the Atmospheric Boundary Layer and Wind  
193 Turbine Wakes, *Atmosphere*, 10, 10.3390/atmos10030124, 2019.

194 Serrano-Ortiz, P., Kowalski, A. S., Domingo, F., Ruiz, B., and Alados-Arboledas, L.: Consequences of Uncertainties in CO<sub>2</sub>  
195 Density for Estimating Net Ecosystem CO<sub>2</sub> Exchange by Open-path Eddy Covariance, *Boundary-Layer Meteorology*, 126,  
196 209-218, 10.1007/s10546-007-9234-1, 2008.

197 Sun, Y., Ma, J., Sude, B., Lin, X., Shang, H., Geng, B., Diao, Z., Du, J., and Quan, Z.: A UAV-Based Eddy Covariance System  
198 for Measurement of Mass and Energy Exchange of the Ecosystem: Preliminary Results, *Sensors*, 21, 10.3390/s21020403,  
199 2021.

200 van den Kroonenberg, A., Martin, T., Buschmann, M., Bange, J., and Vörsmann, P.: Measuring the Wind Vector Using the  
201 Autonomous Mini Aerial Vehicle M2AV, *Journal of Atmospheric and Oceanic Technology*, 25, 1969-1982,  
202 10.1175/2008JTECHA1114.1, 2008.

203 Vellinga, O. S., Dobosy, R. J., Dumas, E. J., Gioli, B., Elbers, J. A., and Hutjes, R. W. A.: Calibration and Quality Assurance  
204 of Flux Observations from a Small Research Aircraft\*, *Journal of Atmospheric and Oceanic Technology*, 30, 161-181,  
205 10.1175/JTECH-D-11-00138.1, 2013.

206 Webb, E. K., Pearman, G. I., and Leuning, R.: Correction of flux measurements for density effects due to heat and water  
207 vapour transfer, *Quarterly Journal of the Royal Meteorological Society*, 106, 85-100, <https://doi.org/10.1002/qj.49710644707>,  
208 1980.

209 Williams, A. and Marcotte, D.: Wind Measurements on a Maneuvering Twin-Engine Turboprop Aircraft Accounting for Flow  
210 Distortion, *Journal of Atmospheric and Oceanic Technology*, 17, 795-810, 10.1175/1520-  
211 0426(2000)017<0795:WMOAMT>2.0.CO;2, 2000.

212
